# Supplementary material for: Supramolecular crystals of Mn(15-crown-5)(MnCl4)(DMF) with dielectric phase transition, high quantum yield and phase transition-induced luminescence enhancement behavior
Source: Royal Society of Chemistry journal article supplement (doi:10.1039/d3dt03838f), 2024-01-01
Supplement: d3dt03838f1.pdf [file d3dt03838f1.pdf]

# Supramolecular crystal of Mn(15-Crown-5)(MnCl<sub>4</sub>)(DMF) with dielectric phase transition, high quantum yield and phase transition-induced luminescence enhancement behavior

Guo-Jun Yuan<sup>\*ab</sup> Xue-Wei Pan<sup>a</sup> Li Chen<sup>d</sup> Chao Chen<sup>d</sup> Xiao-Ming Ren<sup>\*a,c</sup>

<sup>a</sup> State Key Laboratory of Materials-Oriented Chemical Engineering and College of Chemistry and molecular of Engineering, Nanjing Tech University, Nanjing 211816, P. R. China

<sup>b</sup> Department of Chemistry, Nanjing Xiaozhuang University, Nanjing 211171, P. R. China

<sup>c</sup> State Key Laboratory of Coordination Chemistry, Nanjing University, Nanjing 210023, P. R. China

<sup>d</sup> Goldenway Environmental Technology Co., Ltd, Nanjing 211121, P. R. China

Tel.: +86 25 58139476

Email: [ahchljygj@163.com](mailto:ahchljygj@163.com) (GJY); [xmren@njtech.edu.cn](mailto:xmren@njtech.edu.cn) (XMR)

## Contents

Table S1: Crystal data and structure refinements for **1** at 150, 298 and 360 K

Table S2: The shorter Cl...H contacts in the charge-assisted H-bonds of **1** at 150 K, 298 K and 360 K

Table S3: The parameters of  $U_{eq}$  in **1** at 150, 298 and 360 K

Table S4: CIE chromaticity of **1** at different temperatures

Figure S1: Comparison of simulated and experimental Powder X-ray diffraction profiles for **1**.

Figure S2: (a) A molecular monolayer of Mn(15-Crown-5)(MnCl<sub>4</sub>)(DMF) for **1** at 150 K; (b–d) Packing diagram viewed along the a-axes, b-axes and c-axes, respectively, for **1** at 150 K.

Figure S3: (a) A molecular monolayer of Mn(15-Crown-5)(MnCl<sub>4</sub>)(DMF) for **1** at 298 K; (b–d) Packing diagram viewed along the a-axes, b-axes and c-axes, respectively, for **1** at 298 K.

Figure S4: (a) A molecular monolayer of Mn(15-Crown-5)(MnCl<sub>4</sub>)(DMF) for **1** at 360 K; (b–d) Packing diagram viewed along the a-axes, b-axes and c-axes, respectively, for **1** at 360 K.

Figure S5: (a–b) Plots of  $\epsilon'$  vs. temperature in the 150–365 K range; (c–e) Plots of the electric modulus imaginary part versus frequency for **1**; (f) Arrhenius plot for dielectric relaxation in the 203–253 K range for **1**.

Figure S6: ORTEP plots of **1** at 150, 298 and 360 K where the atom displacement ellipsoids are drawn at 50% probability level, indicating that the anisotropic displacements of the Cl1–Cl4 in MnCl<sub>4</sub><sup>2-</sup> coordinated tetrahedron, as well as the O6 and two terminal methyl' C atoms in DMF increase with temperature elevated.

Figure S7: The image for **1** at 303 K with natural light.

Figure S8: (a–f) The variable-temperature images for **1** in the sequence of 303, 320, 340, 350, 360 and 380 K with excitation at 365 nm.

Table S5: Comparison of Mn–Cl bond length (Å), quantum yield (QY, %) and lifetime ( $\tau$ ,  $\mu$ S) in the compounds containing MnCl<sub>4</sub><sup>2-</sup> tetrahedron in literature and this work

Table S1: Crystal data and structure refinements for **1** at 150, 298 and 360 K

| Temp./K                                      | 150 K                                                                           | 298 K                                                                           | 360 K                                                                           |
|----------------------------------------------|---------------------------------------------------------------------------------|---------------------------------------------------------------------------------|---------------------------------------------------------------------------------|
| Formula                                      | C <sub>13</sub> H <sub>27</sub> O <sub>6</sub> NMn <sub>2</sub> Cl <sub>4</sub> | C <sub>13</sub> H <sub>27</sub> O <sub>6</sub> NMn <sub>2</sub> Cl <sub>4</sub> | C <sub>13</sub> H <sub>27</sub> O <sub>6</sub> NMn <sub>2</sub> Cl <sub>4</sub> |
| SG                                           | <i>P</i> 2 <sub>1</sub> 2 <sub>1</sub> 2 <sub>1</sub>                           | <i>P</i> 2 <sub>1</sub> 2 <sub>1</sub> 2 <sub>1</sub>                           | <i>P</i> 2 <sub>1</sub> 2 <sub>1</sub> 2 <sub>1</sub>                           |
| CCDC no.                                     | 2281549                                                                         | 2281551                                                                         | 2281552                                                                         |
| Crystal system                               | Orthorhombic                                                                    | Orthorhombic                                                                    | Orthorhombic                                                                    |
| a (Å)                                        | 10.4466(4)                                                                      | 10.2522(4)                                                                      | 10.292(2)                                                                       |
| b (Å)                                        | 14.3125(6)                                                                      | 14.7124(7)                                                                      | 14.750 (4)                                                                      |
| c (Å)                                        | 14.7885(7)                                                                      | 15.6349(8)                                                                      | 15.679(4)                                                                       |
| α (°)                                        | 90                                                                              | 90                                                                              | 90                                                                              |
| β (°)                                        | 90                                                                              | 90                                                                              | 90                                                                              |
| γ (°)                                        | 90                                                                              | 90                                                                              | 90                                                                              |
| V(Å <sup>3</sup> )/Z                         | 2211.13(16)/4                                                                   | 2358.28(19)/4                                                                   | 2380.2(10)/4                                                                    |
| ρ (g·cm <sup>-3</sup> )                      | 1.637                                                                           | 1.535                                                                           | 1.521                                                                           |
| F(000)                                       | 1112                                                                            | 1112                                                                            | 1112                                                                            |
| Abs. coeff. (mm <sup>-1</sup> )              | 1.652                                                                           | 1.549                                                                           | 1.535                                                                           |
| θ Ranges/°                                   | 2.39-26.33                                                                      | 2.42-22.35                                                                      | 2.37-22.27                                                                      |
| Index ranges                                 | -12 ≤ h ≤ 11                                                                    | -11 ≤ h ≤ 11                                                                    | -11 ≤ h ≤ 12                                                                    |
|                                              | -16 ≤ k ≤ 17                                                                    | -16 ≤ k ≤ 17                                                                    | -16 ≤ k ≤ 17                                                                    |
|                                              | -16 ≤ l ≤ 17                                                                    | -18 ≤ l ≤ 18                                                                    | -18 ≤ l ≤ 18                                                                    |
| R <sub>int</sub>                             | 0.0322                                                                          | 0.0484                                                                          | 0.0549                                                                          |
| Indep. refl/<br>restr.<br>/para.             | 3887/24/256                                                                     | 4131/764/373                                                                    | 4186/798/373                                                                    |
| Goodness of fit on F <sup>2</sup>            | 1.065                                                                           | 1.065                                                                           | 1.047                                                                           |
| R <sub>1</sub> , wR <sub>2</sub> [I > 2σ(I)] | 0.0276<br>0.0508                                                                | 0.0517<br>0.1064                                                                | 0.0620<br>0.1475                                                                |
| R <sub>1</sub> , wR <sub>2</sub> [all data]  | 0.0355<br>0.0545                                                                | 0.0876<br>0.1295                                                                | 0.1072<br>0.1832                                                                |
| Residual (e·Å <sup>-3</sup> )                | 0.335/<br>-0.258                                                                | 0.564/<br>-0.391                                                                | 0.429/<br>-0.382                                                                |

$$R_1 = \frac{\sum ||F_o| - |F_c||}{\sum |F_o|}, wR_2 = \left[ \frac{\sum w(\sum F_o^2 - F_c^2)^2}{\sum w(F_o^2)^2} \right]^{1/2}$$

Table S2: The shorter Cl...H contacts in the charge-assisted H-bonds of **1** at 150 K, 298 K and 360 K

| 150 K      |              | 298 K      |              | 360 K      |              |
|------------|--------------|------------|--------------|------------|--------------|
| Atom pair  | Distance / Å | Atom pair  | Distance / Å | Atom pair  | Distance / Å |
| Cl2...H12C | 2.876        | Cl2...H2AB | 2.906        | Cl2...H13B | 2.825        |
| Cl2...H13C | 2.938        | Cl2...H8B  | 2.926        | Cl4...H4AB | 2.807        |
| Cl4...H10A | 2.948        | Cl2...H12C | 2.776        | Cl4...H7AB | 2.640        |
| Cl4...H12A | 2.905        | Cl4...H2A  | 2.695        |            |              |
|            |              | Cl4...H2AA | 2.892        |            |              |

Table S3: The parameters of  $U_{eq}$  in **1** at 150, 298 and 360 K

| Non-H atom | $U_{eq}(150K)$ | $U_{eq}(298K)$ | $U_{eq}(360K)$ |
|------------|----------------|----------------|----------------|
| Mn1        | 0.02387(14)    | 0.0521(4)      | 0.0628(5)      |
| Mn2        | 0.03137(16)    | 0.0597(4)      | 0.0686(6)      |
| Cl1        | 0.0340(2)      | 0.0649(7)      | 0.0759(9)      |
| Cl2        | 0.0464(3)      | 0.0911(10)     | 0.1056(13)     |
| Cl3        | 0.0428(3)      | 0.0887(9)      | 0.152(2)       |
| Cl4        | 0.0544(3)      | 0.1361(16)     | 0.1051(13)     |
| N1         | 0.0307(8)      | 0.096(3)       | 0.134(4)       |
| O1         | 0.0306(7)      | 0.081(3)       | 0.113(4)       |
| O1A        |                | 0.110(9)       | 0.105(9)       |
| O2         | 0.0305(7)      | 0.075(3)       | 0.104(4)       |
| O2A        |                | 0.094(9)       | 0.123(9)       |
| O3         | 0.0365(7)      | 0.085(3)       | 0.091(4)       |
| O3A        |                | 0.090(8)       | 0.119(9)       |
| O4         | 0.0354(7)      | 0.079(3)       | 0.100(4)       |
| O4A        |                | 0.089(8)       | 0.105(9)       |
| O5         | 0.0362(7)      | 0.096(4)       | 0.099(4)       |
| O5A        |                | 0.100(8)       | 0.103(9)       |
| O6         | 0.0337(7)      | 0.093(3)       | 0.106(3)       |
| C1         | 0.0349(11)     | 0.089(4)       | 0.123(6)       |
| C1A        |                | 0.110(9)       | 0.124(10)      |
| C2         | 0.0346(10)     | 0.082(4)       | 0.131(6)       |
| C2A        |                | 0.091(9)       | 0.123(10)      |
| C3         | 0.0384(11)     | 0.082(4)       | 0.114(6)       |
| C3A        |                | 0.096(9)       | 0.128(10)      |
| C4         | 0.0411(12)     | 0.092(4)       | 0.107(5)       |
| C4A        |                | 0.091(9)       | 0.119(10)      |
| C5         | 0.0437(12)     | 0.088(4)       | 0.117(6)       |
| C5A        |                | 0.094(9)       | 0.117(10)      |
| C6         | 0.0468(13)     | 0.088(4)       | 0.114(6)       |
| C6A        |                | 0.098(9)       | 0.110(10)      |
| C7         | 0.043(3)       | 0.092(5)       | 0.119(6)       |
| C7A        | 0.037(4)       | 0.093(9)       | 0.112(9)       |
| C8         | 0.042(4)       | 0.108(5)       | 0.109(5)       |
| C8A        | 0.039(4)       | 0.095(9)       | 0.111(10)      |
| C9         | 0.0417(12)     | 0.107(6)       | 0.115(6)       |
| C9A        |                | 0.113(9)       | 0.103(9)       |
| C10        | 0.0376(11)     | 0.114(5)       | 0.132(6)       |
| C10A       |                | 0.109(9)       | 0.109(10)      |
| C11        | 0.0325(10)     | 0.107(4)       | 0.122(5)       |
| C12        | 0.0450(13)     | 0.145(7)       | 0.164(8)       |
| C13        | 0.0508(14)     | 0.163(7)       | 0.152(7)       |

Table S4: CIE chromaticity of **1** at different temperatures

| Temperature | CIE x   | CIE y   | X          | Y          | Z          |
|-------------|---------|---------|------------|------------|------------|
| 180 K       | 0.48504 | 0.35971 | 35466.2689 | 18909.6024 | 16236.621  |
| 200 K       | 0.48062 | 0.34637 | 34772.6817 | 20154.6555 | 13721.4035 |
| 250 K       | 0.46272 | 0.33254 | 34308.4075 | 20042.8811 | 10242.0789 |
| 280 K       | 0.46571 | 0.32714 | 34813.1758 | 21639.2838 | 9926.50191 |
| 310 K       | 0.56386 | 0.43064 | 36235.7751 | 17606.2353 | 48302.6245 |
| 340 K       | 0.52759 | 0.39617 | 38743.5563 | 19877.6443 | 29325.5228 |
| 360 K       | 0.57173 | 0.42203 | 45553.2397 | 24628.1124 | 59826.5936 |
| 380 K       | 0.57171 | 0.41955 | 45841.8025 | 25217.6891 | 57917.3342 |

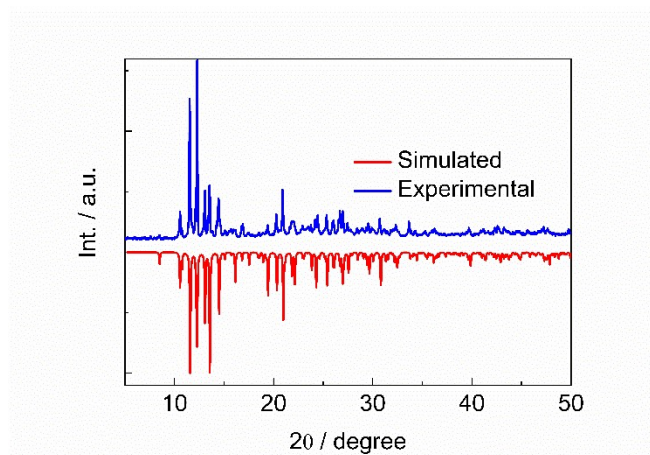

Figure S1: Comparison of simulated and experimental Powder X-ray diffraction profiles for **1**.

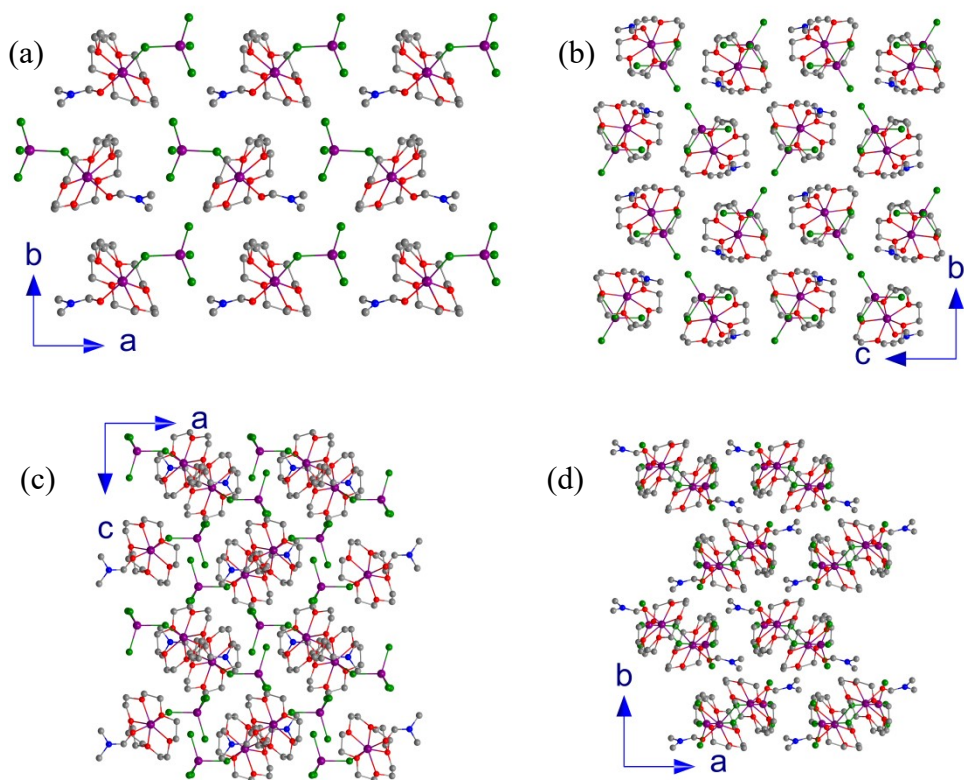

Figure S2: (a) A molecular monolayer of Mn(15-Crown-5)(MnCl<sub>4</sub>)(DMF) for **1** at 150 K; (b–d) Packing diagram viewed along the a-axes, b-axes and c-axes, respectively, for **1** at 150 K.

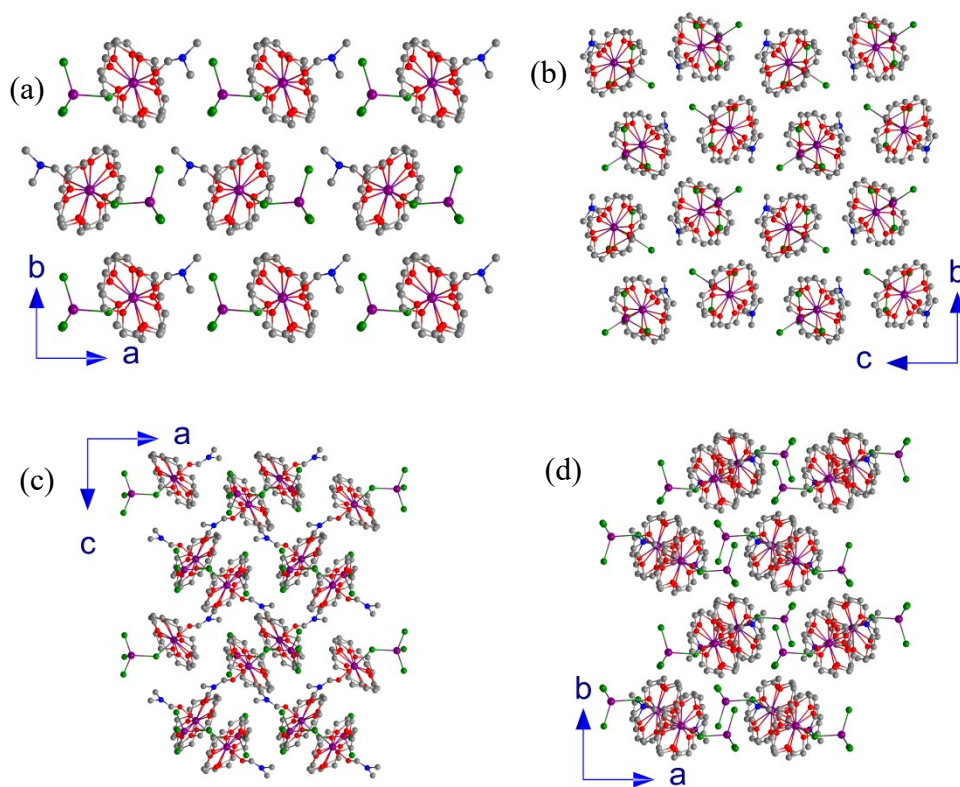

Figure S3: (a) A molecular monolayer of Mn(15-Crown-5)(MnCl<sub>4</sub>)(DMF) for **1** at 298 K; (b–d) Packing diagram viewed along the a-axes, b-axes and c-axes, respectively, for **1** at 298 K.



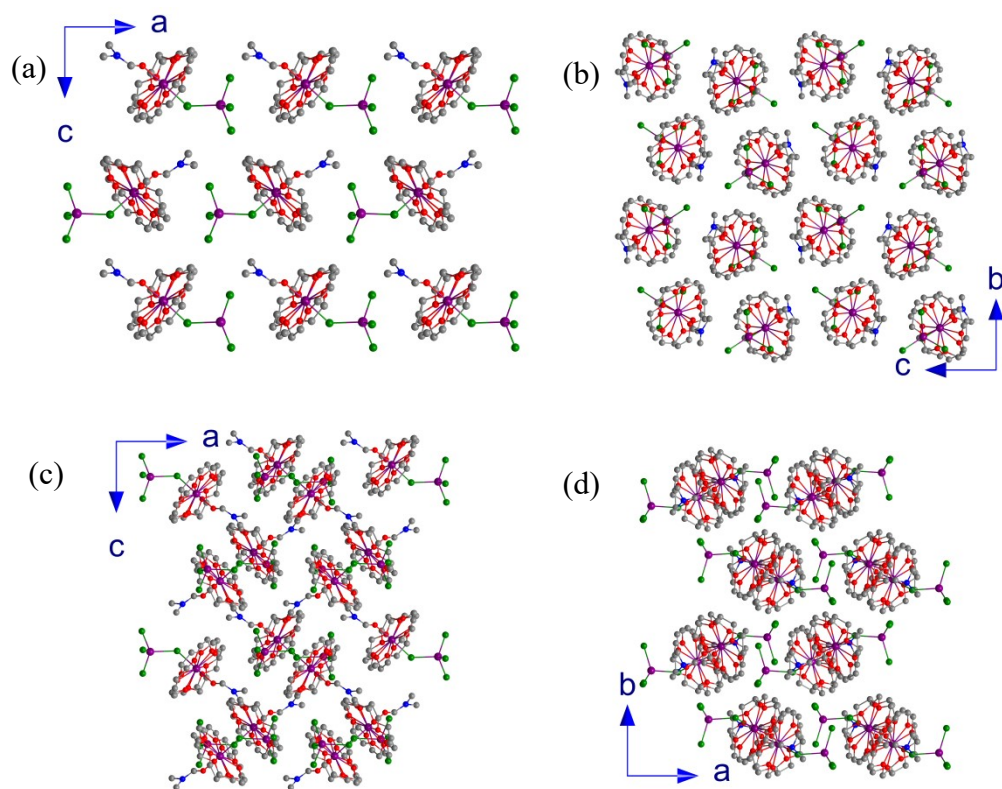

Figure S4: (a) A molecular monolayer of Mn(15-Crown-5)(MnCl<sub>4</sub>)(DMF) for **1** at 360 K; (b–d) Packing diagram viewed along the a-axes, b-axes and c-axes, respectively, for **1** at 360 K.

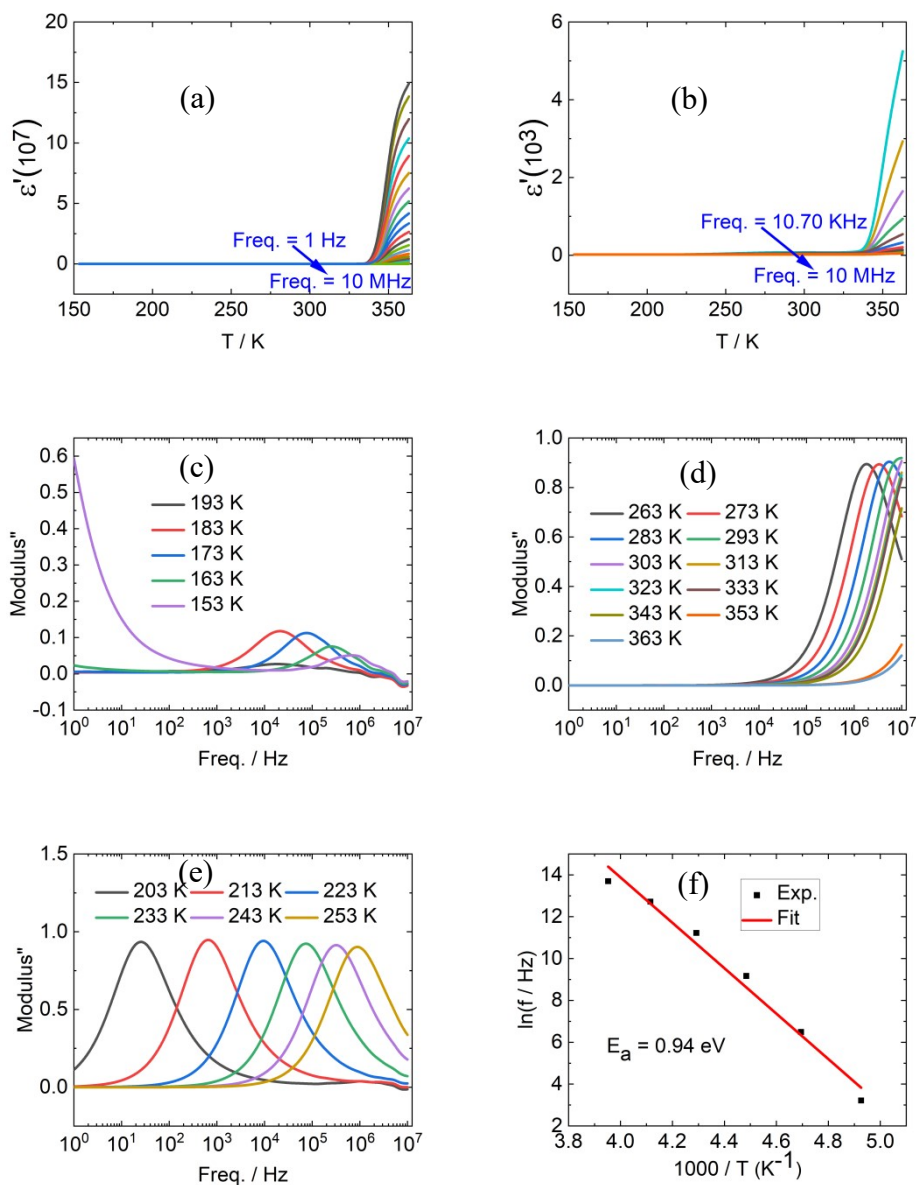

Figure S5: (a–b) Plots of  $\epsilon'$  vs. temperature in the 150–365 K range; (c–e) Plots of the electric modulus imaginary part versus frequency for **1**; (f) Arrhenius plot for dielectric relaxation in the 203–253 K range for **1**.

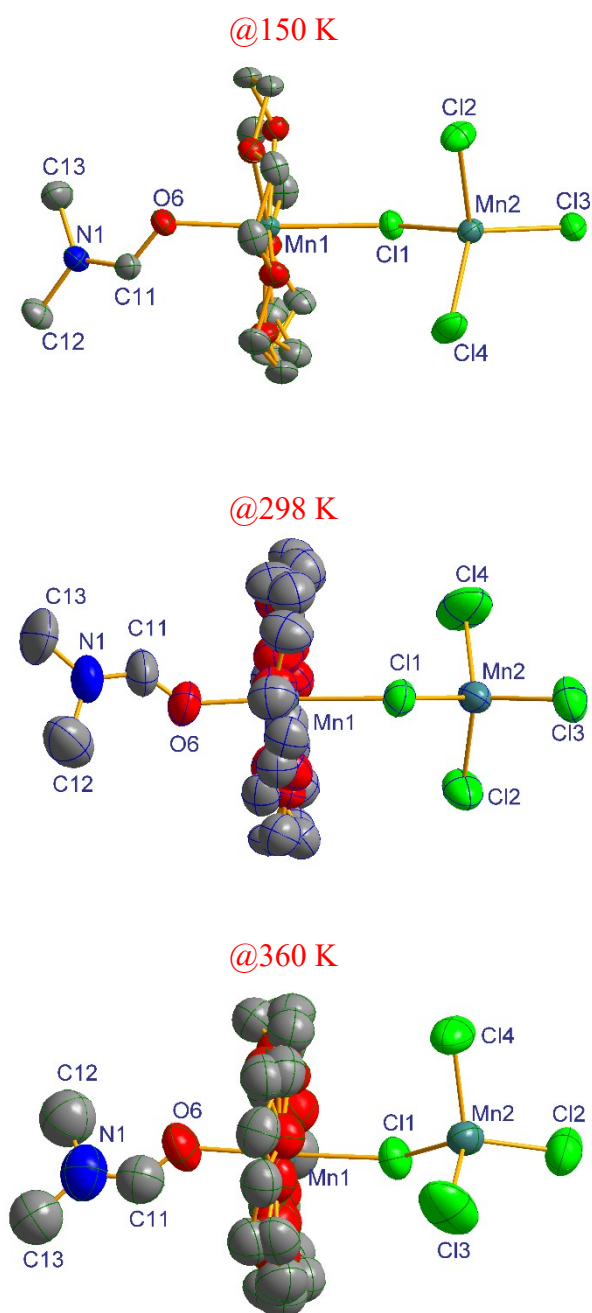

Figure S6: ORTEP plots of **1** at 150, 298 and 360 K where the atom displacement ellipsoids are drawn at 50% probability level, indicating that the anisotropic displacements of the C11–C14 in  $\text{MnCl}_4^{2-}$  coordinated tetrahedron, as well as the O6 and two terminal methyl' C atoms in DMF increase with temperature elevated.

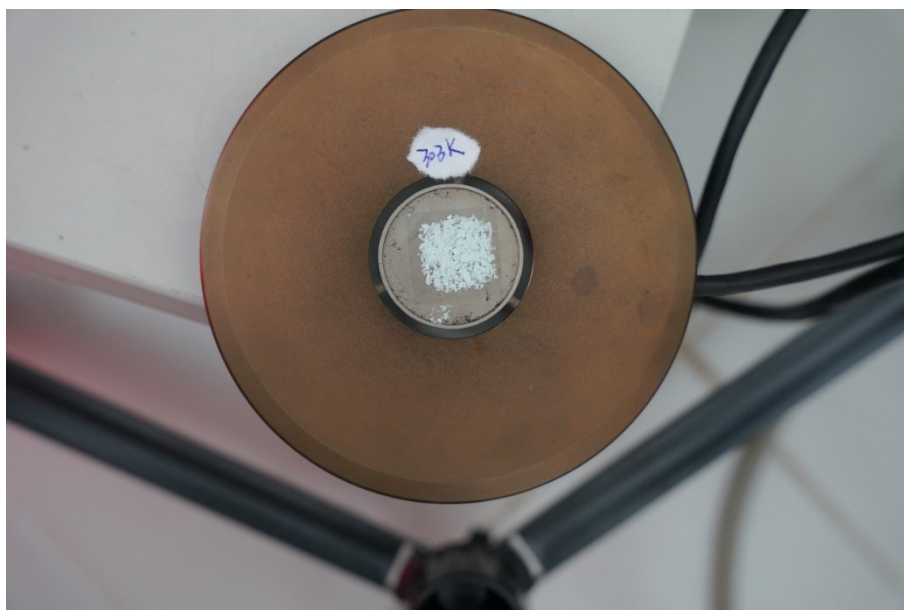

Figure S7: The image for **1** at 303 K with natural light.

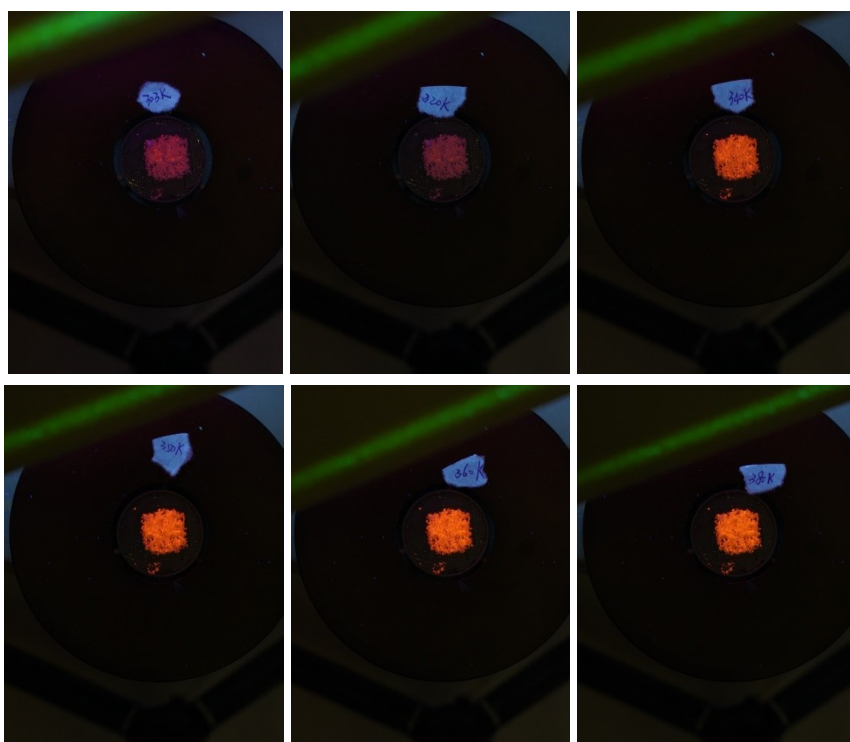

Figure S8: (a-f) The variable-temperature images for **1** in the sequence of 303, 320, 340, 350, 360 and 380 K with excitation at 365 nm.

Table S5: Comparison of Mn–Cl bond length (Å), quantum yield (QY, %) and lifetime ( $\tau$ ,  $\mu$ S) in the compounds containing  $\text{MnCl}_4^{2-}$  tetrahedron in literature and this work

| Compound                                                      | QY (%) / $\tau$ ( $\mu$ S) | Mn-Cl Bond Length (Å)                                | Ref.                                  |
|---------------------------------------------------------------|----------------------------|------------------------------------------------------|---------------------------------------|
| $[(\text{TEA})(\text{TMA})]\text{MnCl}_4$                     | 99/3.74                    | 2.3699(11)<br>2.3696(7)<br>2.3696(7)<br>2.3632(9)    | Inorg. Chem., 2023, 62, 5791–5798.    |
| $[(\text{TPA})(\text{TMA})_3](\text{MnCl}_4)_2$               | 66/3.63                    | 2.3728(14)<br>2.3649(15)<br>2.3572(17)<br>2.3568(17) | Inorg. Chem., 2023, 62, 5791–5798.    |
| $(\text{Piperidinium})_3\text{Cl}[\text{MnCl}_4]$             | 54.5/3500.0                | 2.3861(5)<br>2.3694(5)<br>2.3687(5)<br>2.3312(5)     | Inorg. Chem., 2023, 62, 3202–3211.    |
| $(3\text{-CNDA})_2\text{MnCl}_4$                              | 20.55/600                  | 2.3973(6)<br>2.3628(6)<br>2.3390(6)<br>2.3338(6)     | Dalton Trans., 2022, 51, 14408–14412. |
| $[\text{TMAA}]_2[\text{MnCl}_4]$                              | 35.19/–                    | 2.3701(10)<br>2.3679(10)<br>2.3639(10)<br>2.3551(11) | Dalton. Trans., 2022, 51, 2005–2011   |
| $[\text{Me}_3\text{NCH}_2\text{CH}_2\text{F}]_2\text{MnCl}_4$ | 41.1/–                     | 2.3761(14)<br>2.3738(13)<br>2.3695(13)<br>2.3591(13) | New J. Chem., 2022, 46, 20005–20009.  |
| $(\text{C}_5\text{H}_8\text{N}_2)_2\text{MnCl}_4$             | 79.77/–                    | 2.371(3)<br>2.369(3)<br>2.351(3)<br>2.348(3)         | CrystEngComm, 2022,24,6910–6916.      |
| $[\text{DMAEMP}]\text{MnCl}_4$                                | 81.11/3260.0               | 2.3859(8)<br>2.3712(8)<br>2.3503(8)<br>2.3369(7)     | Chem. Commun., 2021,57,6907–6910.     |
| $[\text{PDMI}]\text{MnCl}_4$                                  | 42.49/3527.0               | 2.395(17)<br>2.373(6)<br>2.35(3)<br>2.35(3)          | Chem. Commun., 2021,57,6907–6910.     |
| $[\text{MP}]_2\text{MnCl}_4 \cdot 2\text{Cl}$                 | 19.96/2890                 | 2.3913(7)                                            | Chem. Commun., 2021,57,6907–6910.     |

|                                                                                 |             |            |                                          |
|---------------------------------------------------------------------------------|-------------|------------|------------------------------------------|
|                                                                                 |             | 2.3620(7)  |                                          |
|                                                                                 |             | 2.3550(6)  |                                          |
|                                                                                 |             | 2.3516(7)  |                                          |
| [DMP]MnCl <sub>4</sub>                                                          | 13.11/787.0 | 2.4050(13) | Chem. Commun., 2021,57,6907–6910.        |
|                                                                                 |             | 2.3973(13) |                                          |
|                                                                                 |             | 2.3336(8)  |                                          |
|                                                                                 |             | 2.3336(8)  |                                          |
| [EP]MnCl <sub>4</sub>                                                           | 7.98/1400.0 | 2.3987(8)  | Chem. Commun., 2021,57,6907–6910.        |
|                                                                                 |             | 2.3709(8)  |                                          |
|                                                                                 |             | 2.3497(8)  |                                          |
|                                                                                 |             | 2.3243(8)  |                                          |
| [TMGD] <sub>2</sub> MnCl <sub>4</sub>                                           | 71.6/3767.6 | 2.373(2)   | J. Mater. Chem. C, 2021, 9, 9952–9961.   |
|                                                                                 |             | 2.370(2)   |                                          |
|                                                                                 |             | 2.360(2)   |                                          |
|                                                                                 |             | 2.351(2)   |                                          |
| [EMMIM] <sub>2</sub> MnCl <sub>4</sub>                                          | 60.6/3880.0 | 2.3651(13) | J. Mater. Chem. C, 2021, 9, 9952–9961.   |
|                                                                                 |             | 2.3580(13) |                                          |
|                                                                                 |             | 2.3562(13) |                                          |
|                                                                                 |             | 2.3530(14) |                                          |
| [TPA] <sub>2</sub> MnCl <sub>4</sub>                                            | 34/3450.0   | 2.3881(6)  | J. Mater. Chem. C, 2021, 9, 9952–9961.   |
|                                                                                 |             | 2.3783(7)  |                                          |
|                                                                                 |             | 2.3682(6)  |                                          |
|                                                                                 |             | 2.3603(6)  |                                          |
| [Me <sub>3</sub> NVinyl] <sub>2</sub> [MnCl <sub>4</sub> ]                      | 2/–         | 2.311(10)  | RSC Adv., 2021, 11, 2329–2336.           |
|                                                                                 |             | 2.306(10)  |                                          |
|                                                                                 |             | 2.303(10)  |                                          |
|                                                                                 |             | 2.303(10)  |                                          |
| (C <sub>4</sub> NOH <sub>10</sub> ) <sub>2</sub> MnCl <sub>4</sub>              | 39/3360.0   | 2.4096(4)  | Chem. Sci., 2019, 10, 3836–3839.         |
|                                                                                 |             | 2.3703(4)  |                                          |
|                                                                                 |             | 2.3600(4)  |                                          |
|                                                                                 |             | 2.3450(4)  |                                          |
| (C <sub>7</sub> H <sub>13</sub> N <sub>2</sub> ) <sub>2</sub> MnCl <sub>4</sub> | 70.78/3900  | 2.3613(9)  | Dalton Trans., 2019, 48, 17451–17455.    |
|                                                                                 |             | 2.3556(9)  |                                          |
|                                                                                 |             | 2.3511(9)  |                                          |
|                                                                                 |             | 2.3503(10) |                                          |
| (N-methyl-piperidinium)MnCl <sub>4</sub>                                        | 79.37/714.5 | 2.3945(11) | Inorg. Chem. Front., 2018, 5, 2615–2619. |
|                                                                                 |             | 2.3570(11) |                                          |
|                                                                                 |             | 2.3567(11) |                                          |
|                                                                                 |             | 2.3374(10) |                                          |
| (N-methyl-pyrrolidinium)MnCl <sub>4</sub>                                       | 1.27/156.2  | 2.3918(14) | Inorg. Chem. Front., 2018, 5, 2615–2619. |
|                                                                                 |             | 2.3599(14) |                                          |
|                                                                                 |             | 2.3488(16) |                                          |
|                                                                                 |             | 2.3408(16) |                                          |
| [(btz) <sub>2</sub> (MnCl <sub>4</sub> )]·2H <sub>2</sub> O                     | 43.17/–     | 2.3828(13) | J. Fluoresc., 2016, 26, 2295–2301.       |

|                                                           |             |            |                                            |
|-----------------------------------------------------------|-------------|------------|--------------------------------------------|
|                                                           |             | 2.3704(13) |                                            |
|                                                           |             | 2.3658(13) |                                            |
|                                                           |             | 2.3565(12) |                                            |
| Mn <sub>3</sub> Cl <sub>6</sub> (18-crown-6) <sub>2</sub> | 20/–        | 2.4282(14) | J. Am. Chem. Soc. 2021, 143, 798–804.      |
|                                                           |             | 2.3735(16) |                                            |
|                                                           |             | 2.3571(16) |                                            |
|                                                           |             | 2.3461(16) |                                            |
| MnCl <sub>2</sub> (15-crown-5)                            | 39/–        | ···        | Inorg. Chem. 2021, 60, 14645–14654.        |
| (KC) <sub>2</sub> MnCl <sub>4</sub>                       | 7.79/2790.0 | 2.3983(12) | J. Am. Chem. Soc., 2019, 141, 15755–15760. |
|                                                           |             | 2.3861(14) |                                            |
|                                                           |             | 2.3585(13) |                                            |
|                                                           |             | 2.3432(13) |                                            |
|                                                           |             | 2.3954(11) |                                            |
|                                                           |             | 2.3935(13) |                                            |
|                                                           |             | 2.3571(13) |                                            |
|                                                           |             | 2.3496(13) |                                            |
| Mn(15-Crown-5)                                            | 68/1.41     | 2.139(8)   | <b>This work</b>                           |
| (MnCl <sub>4</sub> )(DMF)                                 |             | 2.538(3)   |                                            |
|                                                           |             | 2.421(3)   |                                            |
|                                                           |             | 2.339(3)   |                                            |
|                                                           |             | 2.343(3)   |                                            |
|                                                           |             | 2.314(4)   |                                            |
